# Supplementary material for: Unraveling response to temozolomide in preclinical GL261 glioblastoma with MRI/MRSI using radiomics and signal source extraction
Source: PubMed Central journal article supplement (PMC7661707; doi:10.1038/s41598-020-76686-y), 2020-11-12
Supplement: 41598_2020_76686_MOESM1_ESM.pdf [file 41598_2020_76686_MOESM1_ESM.pdf]

# Unraveling response to Temozolomide in preclinical GL261 glioblastoma with MRI/MRSI using radiomics and signal source extraction

Luis Miguel Núñez, Enrique Romero, Margarida Julià-Sapé, Andrés Santos, Maria Jesús Ledesma-Carbayo, Carles Arús, Ana Paula Candiota and Alfredo Vellido

## SUPPLEMENTARY MATERIAL

### DATASET

In **Table S1**, the whole dataset is listed, including relevant characteristics in the classification problem for each mouse.

| DATASET |     |                  |                 |          |     |                  |                 |
|---------|-----|------------------|-----------------|----------|-----|------------------|-----------------|
| TRAIN   |     |                  |                 | HOLD-OUT |     |                  |                 |
| MOUSE # | DAY | Number of SLICES | CONTROL/TREATED | MOUSE #  | DAY | Number of SLICES | CONTROL/TREATED |
| 179     | 17  | 1                | CONTROL         | 1109     | 11  | 4                | CONTROL         |
| 233     | 17  | 1                | CONTROL         | 1110     | 13  | 4                | CONTROL         |
| 234     | 17  | 1                | CONTROL         | 1111     | 16  | 4                | CONTROL         |
| 255     | 14  | 1                | CONTROL         | 1112     | 13  | 4                | CONTROL         |
| 278     | 19  | 1                | CONTROL         | 1471     | 16  | 2                | CONTROL         |
| 288     | 18  | 1                | CONTROL         | 1465     | 15  | 2                | CONTROL         |
| 32      | 16  | 1                | CONTROL         | 1472     | 13  | 3                | CONTROL         |
| 351     | 13  | 1                | CONTROL         | 1474     | 14  | 3                | CONTROL         |
| 520     | 18  | 1                | CONTROL         | 1320     | 18  | 3                | CONTROL         |
| 529     | 18  | 1                | CONTROL         | 1344     | 17  | 3                | CONTROL         |
| 583     | 18  | 1                | CONTROL         | 1348     | 21  | 3                | CONTROL         |
| 69      | 15  | 1                | CONTROL         | 1457     | 23  | 3                | CONTROL         |
| 71      | 16  | 1                | CONTROL         | 1459     | 15  | 2                | CONTROL         |
| 526     | 18  | 1                | TREATED         | 1461     | 15  | 3                | CONTROL         |
| 572     | 18  | 1                | TREATED         | 1462     | 15  | 3                | CONTROL         |
| 574     | 26  | 1                | TREATED         | 1466     | 23  | 3                | CONTROL         |
| 776     | 34  | 1                | TREATED         | 975      | 26  | 4                | TREATED         |
| 795     | 18  | 1                | TREATED         | 1023     | 23  | 4                | TREATED         |
| 797     | 22  | 1                | TREATED         | 1026     | 23  | 4                | TREATED         |
| 808     | 33  | 1                | TREATED         | 1108     | 29  | 3                | TREATED         |
| 415     | 22  | 1                | TREATED         | 1100     | 26  | 4                | TREATED         |
| 418     | 22  | 1                | TREATED         | 971      | 26  | 4                | TREATED         |
| 437     | 23  | 1                | TREATED         | 1412     | 23  | 2                | TREATED         |
| 525     | 22  | 1                | TREATED         | 1445     | 23  | 4                | TREATED         |

|     |    |   |         |      |    |   |         |
|-----|----|---|---------|------|----|---|---------|
| 527 | 22 | 1 | TREATED | 1447 | 28 | 3 | TREATED |
| 575 | 26 | 1 | TREATED | 1450 | 24 | 2 | TREATED |
| 584 | 26 | 1 | TREATED | 1451 | 23 | 3 | TREATED |
| 586 | 22 | 1 | TREATED | 1456 | 23 | 2 | TREATED |
| 821 | 34 | 1 | TREATED | 1458 | 23 | 4 | TREATED |
| 414 | 24 | 1 | TREATED | 1460 | 23 | 2 | TREATED |
| 419 | 24 | 1 | TREATED | 1463 | 23 | 1 | TREATED |
| 521 | 18 | 1 | TREATED |      |    |   |         |

Table S1: Mice dataset details.

## RADIOMICS TEXTURE FEATURES

The 42 texture features used in the Radiomics approach of our research are listed in **Table S2**, according to which matrix they are extracted from.

| <b>Gray Level Co-occurrence Matrix (GLCM)</b> |                                            |
|-----------------------------------------------|--------------------------------------------|
| 1                                             | Energy                                     |
| 2                                             | Contrast                                   |
| 3                                             | Entropy                                    |
| 4                                             | Homogeneity                                |
| 5                                             | Correlation                                |
| 6                                             | SumAverage                                 |
| 7                                             | Variance                                   |
| 8                                             | Dissimilarity                              |
| 9                                             | Autocorrelation                            |
| <b>Gray Level Run Length Matrix (GLRLM)</b>   |                                            |
| 1                                             | Short Run Emphasis (SRE)                   |
| 2                                             | Long Run Emphasis (LRE)                    |
| 3                                             | Gray Level Non-Uniformity (GLN)            |
| 4                                             | Run Length Non-Uniformity (RLN)            |
| 5                                             | Run Percentage (RP)                        |
| 6                                             | Low Gray-Level Run Emphasis (LGRE)         |
| 7                                             | High Gray-Level Run Emphasis (HGRE)        |
| 8                                             | Short Run Low Gray-Level Emphasis (SRLGE)  |
| 9                                             | Short Run High Gray-Level Emphasis (SRHGE) |
| 10                                            | Long Run Low Gray-Level Emphasis (LRLGE)   |
| 11                                            | Long Run High Gray-Level Emphasis (LRHGE)  |
| 12                                            | Gray-Level Variance (GLV)                  |
| <b>Gray-Level Size Zone Matrix (GLSZM):</b>   |                                            |
| 1                                             | Small Zone Emphasis (SZE)                  |
| 2                                             | Large Zone Emphasis (LZE)                  |
| 3                                             | Gray-Level Nonuniformity (GLN)             |
| 4                                             | Zone-Size Nonuniformity (ZSN)              |
| 5                                             | Zone Percentage (ZP)                       |
| 6                                             | Low Gray-Level Zone Emphasis (LGZE)        |
| 7                                             | High Gray-Level Zone Emphasis (HGZE)       |

|                                                          |                                             |
|----------------------------------------------------------|---------------------------------------------|
| 8                                                        | Small Zone Low Gray-Level Emphasis (SZLGE)  |
| 9                                                        | Small Zone High Gray-Level Emphasis (SZHGE) |
| 10                                                       | Large Zone Low Gray-Level Emphasis (LZLGE)  |
| 11                                                       | Large Zone High Gray-Level Emphasis (LZHGE) |
| 12                                                       | Gray-Level Variance (GLV)                   |
| <b>Neighborhood Gray-Tone Difference Matrix (NGTDM):</b> |                                             |
| 1                                                        | Coarseness                                  |
| 2                                                        | Contrast                                    |
| 3                                                        | Busyness                                    |
| 4                                                        | Complexity                                  |
| 5                                                        | Strength                                    |

Table S2: Details of radiomics texture features.

## RADIOMICS FEATURE SELECTION

Table S3 shows how features were ranked by both by the *t*-test and the wrapper feature selection methods.

| Ranking Position | <i>t</i> -Test method | Wrapper Method  |
|------------------|-----------------------|-----------------|
| 1                | Perimeter9            | GLCMEntropy     |
| 2                | Perimeter8            | Perimeter9      |
| 3                | GLRLMRLV              | GTDMComplexity  |
| 4                | Perimeter7            | GLSZMSZLGE      |
| 5                | Euler7                | Area16          |
| 6                | Euler6                | Area13          |
| 7                | GLRLMGLN              | GLRLMRLV        |
| 8                | Perimeter6            | GLRLMRLN        |
| 9                | GLCMVariance          | Euler1          |
| 10               | GLSZMGLN              | GLRLMSRE        |
| 11               | GLCMEntropy           | Euler16         |
| 12               | Perimeter10           | GLSZMLGZE       |
| 13               | GLCMEnergy            | Euler15         |
| 14               | GLRLMGLNN             | GLSZMGLV        |
| 15               | Euler5                | GLCMCorrelation |
| 16               | Perimeter5            | Euler9          |
| 17               | GLRLMSRHGE            | Perimeter16     |
| 18               | Euler12               | Euler2          |
| 19               | Euler2                | Area12          |
| 20               | GTDMContrast          | GLSZMZP         |
| 21               | GLSZMSZLGE            | GTDMStrength    |
| 22               | Euler3                | Area10          |
| 23               | Perimeter4            | GLRLMSRHGE      |
| 24               | Euler10               | GLCMVariance    |
| 25               | GLCMCorrelation       | Euler5          |

|    |                     |                   |
|----|---------------------|-------------------|
| 26 | GLSZMLGZE           | GLCMHomogeneity   |
| 27 | GLSZMSZHGE          | Area11            |
| 28 | Euler4              | GLRLMSRLGE        |
| 29 | GLRLMHGRE           | Perimeter6        |
| 30 | GLCMAutoCorrelation | GLRLMRP           |
| 31 | GLSZMHGZE           | GLSZMSZE          |
| 32 | Euler8              | Area14            |
| 33 | GLCMSumAverage      | GTDMContrast      |
| 34 | Euler11             | GLRLMGLNN         |
| 35 | Perimeter3          | Euler14           |
| 36 | Euler14             | Euler10           |
| 37 | Area16              | Euler13           |
| 38 | GLSZMZSV            | GLRLMLGRE         |
| 39 | Perimeter13         | GLRLMLRHGE        |
| 40 | GLRLMSRE            | GLSZMGLN          |
| 41 | Area12              | GLSZMZSN          |
| 42 | GLRLMRLN            | GLSZMLZE          |
| 43 | GLSZMGLV            | Perimeter14       |
| 44 | GLCMHomogeneity     | Perimeter5        |
| 45 | Perimeter11         | Euler11           |
| 46 | GLSZMZP             | Perimeter10       |
| 47 | Perimeter16         | GLCMDissimilarity |
| 48 | GTDMStrength        | GLCMEnergy        |
| 49 | GLRLMRP             | GLSZMHGZE         |
| 50 | Euler16             | Perimeter7        |
| 51 | Area13              | GLSZMLZLGE        |
| 52 | Area1               | GLRLMGLN          |
| 53 | Area2               | Euler6            |
| 54 | Area3               | GLRLMGLV          |
| 55 | Perimeter2          | Perimeter3        |
| 56 | Area4               | Perimeter11       |
| 57 | Area5               | GLCMSumAverage    |
| 58 | Euler1              | GLRLMLRE          |
| 59 | GLCMDissimilarity   | Perimeter4        |
| 60 | GLRLMLRE            | Area9             |
| 61 | GLRLMLGRE           | Euler7            |
| 62 | Perimeter1          | Euler3            |
| 63 | Area6               | Perimeter2        |
| 64 | GLRLMLRLGE          | Perimeter13       |
| 65 | GLRLMSRLGE          | Perimeter1        |
| 66 | GLSZMLZE            | Euler4            |
| 67 | Area7               | Perimeter12       |
| 68 | GLSZMLZLGE          | GLSZMZSV          |
| 69 | Perimeter14         | GTDMCoarseness    |
| 70 | GLRLMRLNN           | GLRLMRLNN         |
| 71 | Area8               | GLRLMLRLGE        |

|    |                 |                     |
|----|-----------------|---------------------|
| 72 | GLCMContrast    | GLSZMSZHGE          |
| 73 | GLSZMLZHGE      | Euler12             |
| 74 | Area11          | Perimeter8          |
| 75 | GLRLMLRHGE      | GLRLMHGRE           |
| 76 | Euler9          | GLSZMLZHGE          |
| 77 | Area9           | Area1               |
| 78 | GTDMBusyness    | Euler8              |
| 79 | Area14          | Area2               |
| 80 | Euler15         | Area3               |
| 81 | Area15          | Area4               |
| 82 | GTDMLCoarseness | GTDMBusyness        |
| 83 | GLSZMZSN        | Area5               |
| 84 | GTDMLComplexity | Area15              |
| 85 | Perimeter15     | GLCMContrast        |
| 86 | GLSZMSZE        | Area6               |
| 87 | Area10          | Perimeter15         |
| 88 | GLRLMGLV        | GLCMAutoCorrelation |
| 89 | Perimeter12     | Area7               |
| 90 | Euler13         | Area8               |

*Table S3: Radiomics feature ranking obtained by both selection methods. In bold, the first 30 features used in the paper experiments.*

## EXTRACTED SOURCES

In the following *Figure S1* the 20 sources extracted from the 4,465 mice spectra are represented. These sources were the ones used in the weights calculation process. Those weights were later used in the whole pipeline for classifiers creation and maps drawing. All the sources have an ID that identifies them and let the corresponding rankings of the *t*-test and wrapper shown in *Table S4* be easily interpretable.

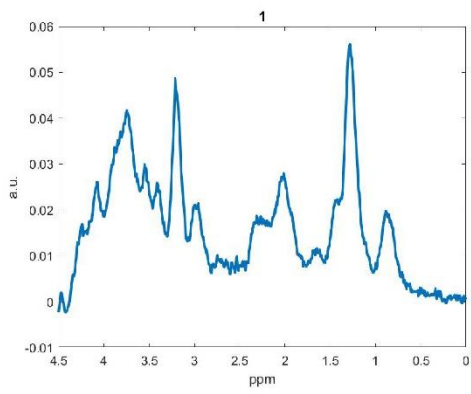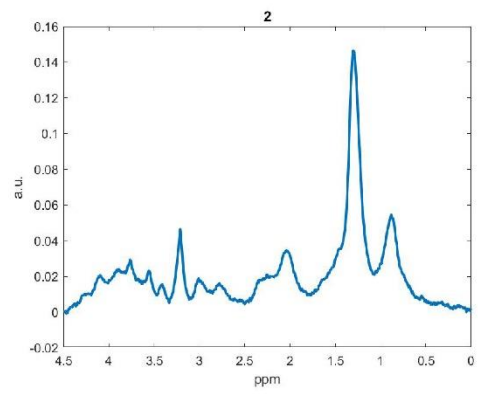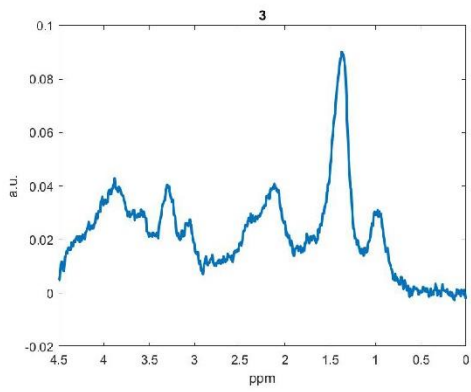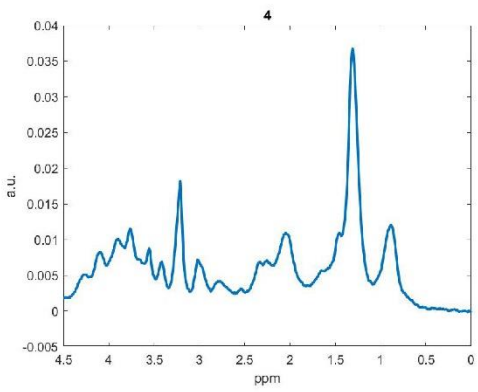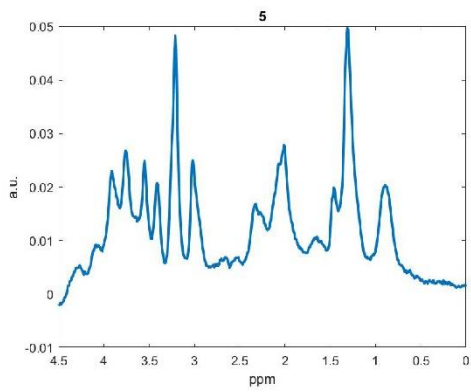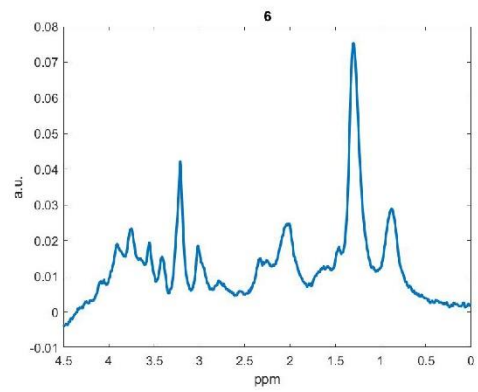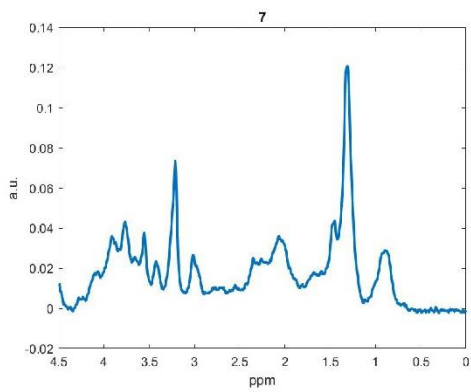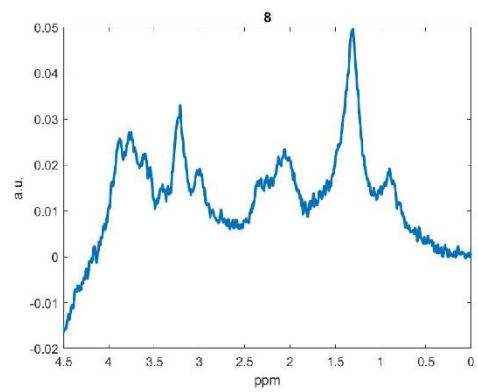

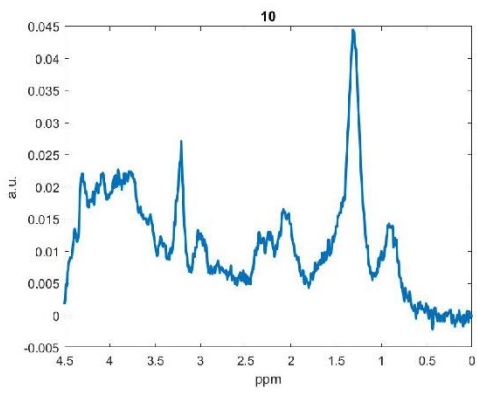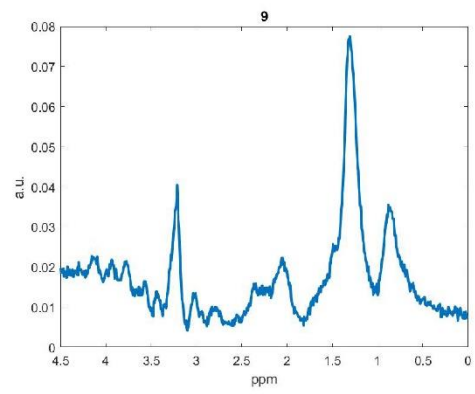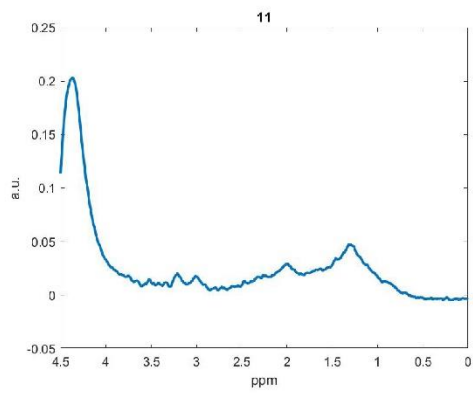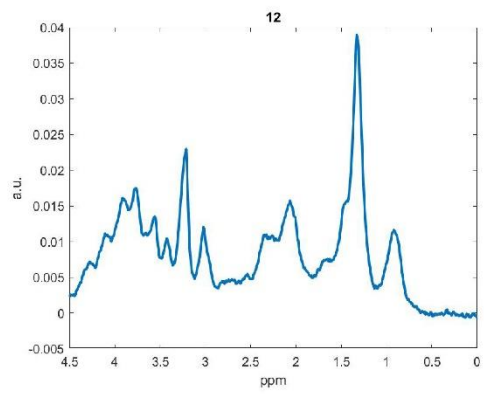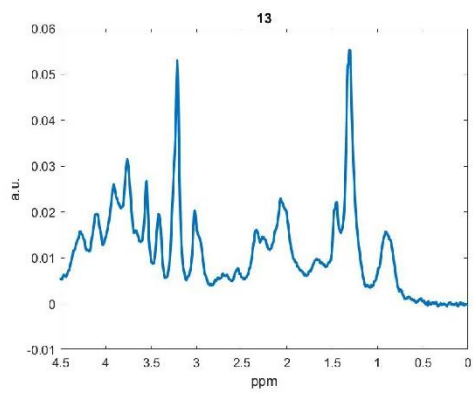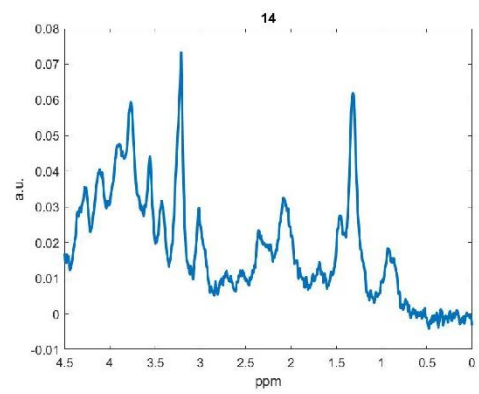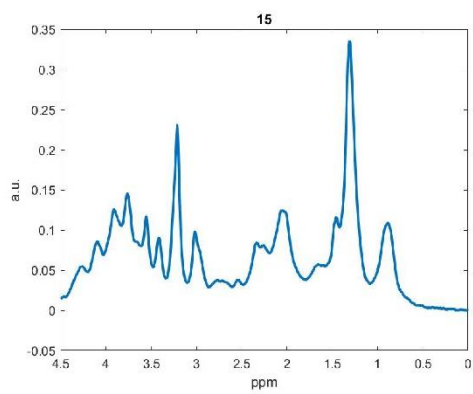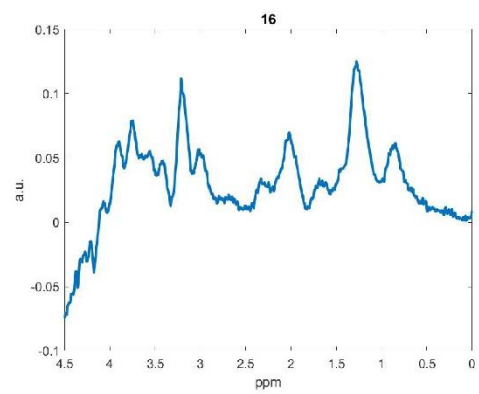

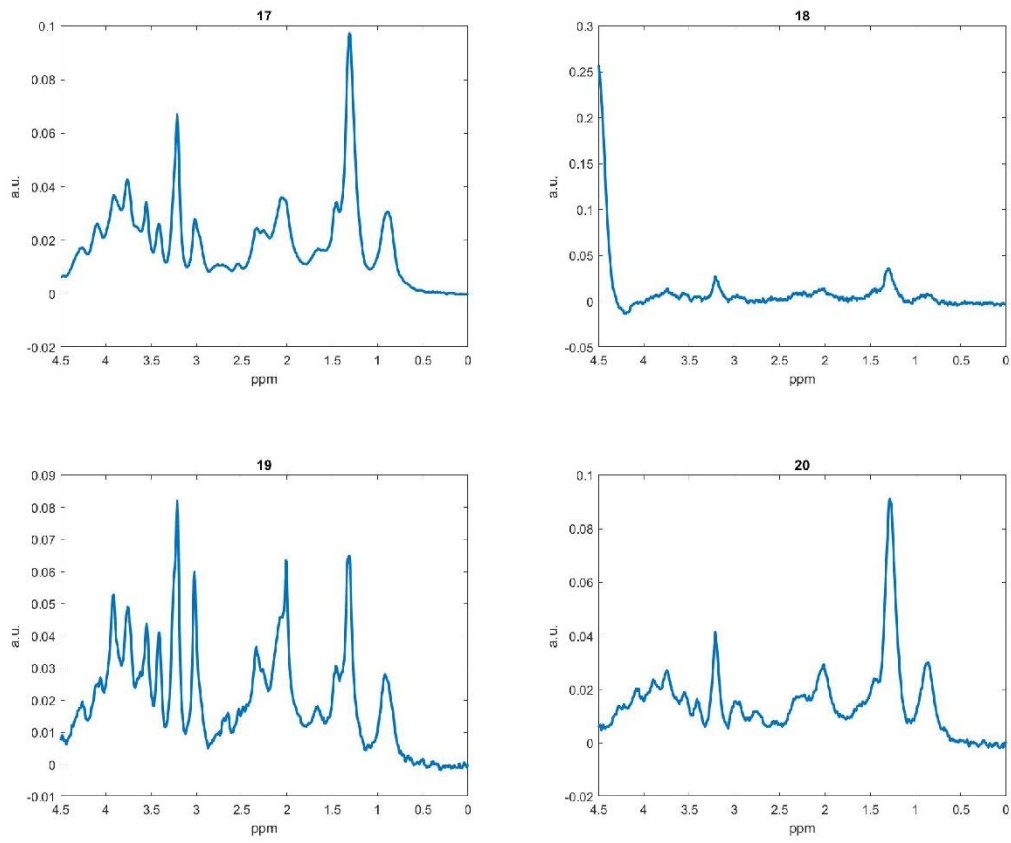

Figure 1: The 20 cNMF-extracted sources used in our experiments. Horizontal axis: frequency in parts per million (ppm: dimensionless units).



| Ranking Position | t-Test method | Wrapper method |
|------------------|---------------|----------------|
| 1                | 14            | 2              |
| 2                | 2             | 10             |
| 3                | 10            | 15             |
| 4                | 16            | 1              |
| 5                | 7             | 7              |
| 6                | 8             | 8              |
| 7                | 13            | 16             |
| 8                | 20            | 12             |
| 9                | 12            | 4              |
| 10               | 15            | 6              |
| 11               | 5             | 5              |
| 12               | 9             | 19             |
| 13               | 4             | 3              |
| 14               | 11            | 9              |
| 15               | 1             | 17             |
| 16               | 17            | 20             |
| 17               | 19            | 11             |
| 18               | 18            | 18             |
| 19               | 6             | 13             |
| 20               | 3             | 14             |

Table S4: cNMF sources ranking by t-test and wrapper methods.

## RESULTS

The results graphically presented in Figures 1 and 2 of the main text are numerically summarized in Tables S5, S6, S7 and S8.

Table S5 corresponds to Figure 1a in the main text and represents Radiomics results.

Table S6 corresponds to Figure 1b in the main text and represents Radiomics voting results.

Table S7 corresponds to Figure 2a in the main text and represents sources results.

Table S8 corresponds to Figure 2b in the main text and represents sources voting results.

| Number of Features | Wrapper | t-test |
|--------------------|---------|--------|
| 1                  | 0.6737  | 0.5684 |
| 2                  | 0.7474  | 0.5895 |
| 3                  | 0.6632  | 0.5579 |
| 4                  | 0.7053  | 0.5684 |
| 5                  | 0.6211  | 0.5579 |
| 6                  | 0.6632  | 0.6000 |

|    |        |        |
|----|--------|--------|
| 7  | 0.6526 | 0.6105 |
| 8  | 0.6526 | 0.6000 |
| 9  | 0.6211 | 0.5895 |
| 10 | 0.6316 | 0.6211 |
| 11 | 0.6211 | 0.6211 |
| 12 | 0.6211 | 0.5895 |
| 13 | 0.6421 | 0.5684 |
| 14 | 0.6526 | 0.5474 |
| 15 | 0.6316 | 0.5684 |
| 16 | 0.6632 | 0.5368 |
| 17 | 0.6632 | 0.5368 |
| 18 | 0.6526 | 0.6105 |
| 19 | 0.6737 | 0.6316 |
| 20 | 0.6737 | 0.6105 |
| 21 | 0.6526 | 0.6105 |
| 22 | 0.6526 | 0.6105 |
| 23 | 0.6421 | 0.5474 |
| 24 | 0.6632 | 0.5684 |
| 25 | 0.6632 | 0.5368 |
| 26 | 0.6632 | 0.5263 |
| 27 | 0.6737 | 0.4842 |
| 28 | 0.6632 | 0.4737 |
| 29 | 0.6526 | 0.4632 |
| 30 | 0.6526 | 0.5158 |

*Table S5: Radiomics results*

| Number of Features | Wrapper | t-test |
|--------------------|---------|--------|
| 1                  | 0.7742  | 0.5484 |
| 2                  | 0.7742  | 0.5484 |
| 3                  | 0.7419  | 0.6452 |
| 4                  | 0.7097  | 0.6129 |
| 5                  | 0.6129  | 0.5806 |
| 6                  | 0.6452  | 0.6774 |
| 7                  | 0.7097  | 0.8065 |
| 8                  | 0.7097  | 0.6452 |
| 9                  | 0.6452  | 0.8387 |
| 10                 | 0.6452  | 0.8710 |
| 11                 | 0.6452  | 0.7419 |
| 12                 | 0.6452  | 0.7419 |
| 13                 | 0.6452  | 0.6452 |
| 14                 | 0.6452  | 0.6774 |
| 15                 | 0.6129  | 0.6774 |
| 16                 | 0.6452  | 0.7097 |
| 17                 | 0.6452  | 0.6774 |

|    |        |        |
|----|--------|--------|
| 18 | 0.6452 | 0.8065 |
| 19 | 0.6452 | 0.8387 |
| 20 | 0.6452 | 0.8065 |
| 21 | 0.6452 | 0.7742 |
| 22 | 0.6774 | 0.7419 |
| 23 | 0.6452 | 0.6129 |
| 24 | 0.6452 | 0.5806 |
| 25 | 0.6452 | 0.6452 |
| 26 | 0.6452 | 0.6452 |
| 27 | 0.6774 | 0.5161 |
| 28 | 0.6774 | 0.4839 |
| 29 | 0.6774 | 0.4839 |
| 30 | 0.6774 | 0.5484 |

*Table S6: Radiomics voting results*

| Number of Features | Wrapper | t-test |
|--------------------|---------|--------|
| 1                  | 0.5016  | 0.5686 |
| 2                  | 0.5330  | 0.5627 |
| 3                  | 0.5765  | 0.5960 |
| 4                  | 0.5838  | 0.5772 |
| 5                  | 0.5907  | 0.5907 |
| 6                  | 0.6431  | 0.6431 |
| 7                  | 0.6458  | 0.6448 |
| 8                  | 0.8176  | 0.6154 |
| 9                  | 0.8203  | 0.7586 |
| 10                 | 0.8216  | 0.7820 |
| 11                 | 0.8219  | 0.7929 |
| 12                 | 0.8219  | 0.7902 |
| 13                 | 0.8219  | 0.7886 |
| 14                 | 0.8160  | 0.7916 |
| 15                 | 0.8163  | 0.8150 |
| 16                 | 0.8166  | 0.8193 |
| 17                 | 0.8173  | 0.8199 |
| 18                 | 0.8176  | 0.8206 |
| 19                 | 0.8203  | 0.8160 |
| 20                 | 0.8331  | 0.8160 |

*Table S7: Sources results*

| Number of Features | Wrapper | t-test |
|--------------------|---------|--------|
| 1                  | 0.4839  | 0.6452 |
| 2                  | 0.4839  | 0.7097 |
| 3                  | 0.5161  | 0.7419 |
| 4                  | 0.5484  | 0.6452 |
| 5                  | 0.5484  | 0.6774 |
| 6                  | 0.6774  | 0.7097 |
| 7                  | 0.7097  | 0.6452 |
| 8                  | 0.9032  | 0.6452 |
| 9                  | 0.9032  | 0.8710 |
| 10                 | 0.9032  | 0.8710 |
| 11                 | 0.9032  | 0.8710 |
| 12                 | 0.9032  | 0.8710 |
| 13                 | 0.9032  | 0.8710 |
| 14                 | 0.9032  | 0.8710 |
| 15                 | 0.9032  | 0.9032 |
| 16                 | 0.9032  | 0.9032 |
| 17                 | 0.9032  | 0.9032 |
| 18                 | 0.9032  | 0.9032 |
| 19                 | 0.9032  | 0.9032 |
| 20                 | 0.9032  | 0.9032 |

*Table S8: Sources voting results*
